# Supplementary material for: Attention-Deficit/Hyperactivity Disorder Predominantly Inattentive Subtype/Presentation: Research Progress and Translational Studies
Source: MDPI journal article supplement (doi:10.3390/brainsci10050292), 2020-05-14
Supplement: s1 [file s1]

**Supplementary Table S1: Systematic search process and terms for study questions**

| Question                                                              | Search process (Key terms in Pubmed and Embase)                                                                                                                                                                                                                                                                                                                                                          | Results                                                                                                                                |
|-----------------------------------------------------------------------|----------------------------------------------------------------------------------------------------------------------------------------------------------------------------------------------------------------------------------------------------------------------------------------------------------------------------------------------------------------------------------------------------------|----------------------------------------------------------------------------------------------------------------------------------------|
| <b>What is known about the behavioral impairments in ADHD-PI?</b>     | <i>attention deficit hyperactivity disorder predominantly inattentive AND behavioral impairment</i><br><i>attention deficit hyperactivity disorder predominantly inattentive AND behavioral problem</i><br><i>attention deficit hyperactivity disorder predominantly inattentive AND behavioral deficit</i><br><i>attention deficit hyperactivity disorder predominantly inattentive AND inattention</i> | # of articles after literature search: <b>375</b><br># of duplicates: <b>198</b><br># of studies met the inclusion criteria: <b>65</b> |
| <b>What is known about the neurocognitive impairments in ADHD-PI?</b> | <i>attention deficit hyperactivity disorder predominantly inattentive AND neurocognitive impairment</i><br><i>attention deficit hyperactivity disorder predominantly inattentive AND neurocognitive dysfunction</i><br><i>attention deficit hyperactivity disorder predominantly inattentive AND neurocognitive deficit</i>                                                                              | # of articles after literature search: <b>31</b><br># of duplicates: <b>16</b><br># of studies met the inclusion criteria: <b>10</b>   |
| <b>What are the comorbidity disorders or features of ADHD-PI?</b>     | <i>attention deficit hyperactivity disorder predominantly inattentive AND comorbid features</i><br><i>attention deficit hyperactivity disorder predominantly inattentive AND comorbid disorders</i>                                                                                                                                                                                                      | # of articles after literature search: <b>169</b><br># of duplicates: <b>45</b><br># of studies met the inclusion criteria: <b>18</b>  |
| <b>What is known about the neurobiology of ADHD-PI?</b>               | <i>attention deficit hyperactivity disorder predominantly inattentive AND neuroimaging</i><br><i>attention deficit hyperactivity disorder predominantly inattentive AND neuroanatomy</i>                                                                                                                                                                                                                 | # of articles after literature search: <b>62</b><br># of duplicates: <b>36</b><br># of studies met the inclusion criteria: <b>12</b>   |

|                                                              |                                                                                                                                                                                                                                                                                                                                                                                          |                                                                                                                                       |
|--------------------------------------------------------------|------------------------------------------------------------------------------------------------------------------------------------------------------------------------------------------------------------------------------------------------------------------------------------------------------------------------------------------------------------------------------------------|---------------------------------------------------------------------------------------------------------------------------------------|
|                                                              | <i>attention deficit hyperactivity disorder predominantly inattentive AND structural volume</i><br><i>attention deficit hyperactivity disorder predominantly inattentive AND functional neuroimaging</i><br><i>attention deficit hyperactivity disorder predominantly inattentive AND structural connectome</i>                                                                          |                                                                                                                                       |
| <b>What is known about the genetics of ADHD-PI?</b>          | <i>attention deficit hyperactivity disorder predominantly inattentive AND genetics</i><br><i>attention deficit hyperactivity disorder predominantly inattentive AND genes</i>                                                                                                                                                                                                            | # of articles after literature search: <b>83</b><br># of duplicates: <b>37</b><br># of studies met the inclusion criteria: <b>9</b>   |
| <b>How do ADHD-PI patients respond to medications ?</b>      | <i>attention deficit hyperactivity disorder predominantly inattentive AND pharmacotherapy</i><br><i>attention deficit hyperactivity disorder predominantly inattentive AND methylphenidate</i><br><i>attention deficit hyperactivity disorder predominantly inattentive AND atomoxetine</i><br><i>attention deficit hyperactivity disorder predominantly inattentive AND amphetamine</i> | # of articles after literature search: <b>214</b><br># of duplicates: <b>78</b><br># of studies met the inclusion criteria: <b>15</b> |
| <b>What are the findings of animal research on ADHD-PI ?</b> | <i>attention deficit hyperactivity disorder predominantly inattentive AND animal models</i><br><i>attention deficit hyperactivity disorder predominantly inattentive AND Wistar Kyoto rat</i>                                                                                                                                                                                            | # of articles after literature search: <b>24</b><br># of duplicates: <b>13</b><br># of studies included in the review: <b>4</b>       |
